# Supplementary material
Source: MDPI journal article supplement (https://www.mdpi.com/2571-9408/5/1/5)
Supplement: s1 [file s1]

| Code         | NaKa1  | MgKa1  | AlKa1   | SiKa1   | P Ka1  | S Ka1  | K Ka1  | CaKa1  | BaLa1  | TiKa1  | V Ka1  | CrKa1  | MnKa1  | FeKa1   | CoKa1  | NiKa1  | CuKa1  |
|--------------|--------|--------|---------|---------|--------|--------|--------|--------|--------|--------|--------|--------|--------|---------|--------|--------|--------|
| 457          | 0.5234 | 0.3474 | 7.7030  | 18.9693 | 0.0001 | 0.4186 | 1.9937 | 0.4350 | 0.1253 | 0.6748 | 0.0234 | 0.0155 | 0.0180 | 6.4038  | 0.0032 | 0.0079 | 0.0075 |
| 459          | 0.5209 | 0.3529 | 7.6136  | 19.7459 | 0.0045 | 0.7215 | 1.6973 | 0.8574 | 0.1675 | 0.7759 | 0.0201 | 0.0138 | 0.0163 | 5.1095  | 0.0028 | 0.0098 | 0.0083 |
| 462          | 0.4843 | 0.8732 | 6.9592  | 19.0044 | 0.0445 | 0.4284 | 1.6511 | 0.7671 | 0.2166 | 0.6134 | 0.0113 | 0.0134 | 0.0157 | 6.6813  | 0.0034 | 0.0065 | 0.0040 |
| 466          | 0.3581 | 0.7057 | 8.1213  | 18.0649 | 0.0606 | 0.5402 | 1.9751 | 0.7274 | 0.1188 | 0.5109 | 0.0362 | 0.0204 | 0.0014 | 12.8729 | 0.0053 | 0.0042 | 0.0102 |
| 903          | 0.5297 | 0.5117 | 6.7038  | 13.4862 | 0.0192 | 0.4367 | 1.0749 | 0.6411 | 0.1165 | 0.6763 | 0.0138 | 0.0156 | 0.0133 | 5.9248  | 0.0030 | 0.0072 | 0.0081 |
| 3984.3       | 0.5199 | 0.3428 | 7.7431  | 19.7805 | 0.0084 | 0.4259 | 1.9792 | 0.3773 | 0.1430 | 0.8329 | 0.0199 | 0.0143 | 0.0227 | 5.0292  | 0.0029 | 0.0107 | 0.0071 |
| 434.6        | 0.5358 | 0.3590 | 5.6862  | 16.7180 | 0.0185 | 0.2415 | 2.1145 | 0.9060 | 0.2897 | 0.8341 | 0.0142 | 0.0102 | 0.0338 | 5.1212  | 0.0029 | 0.0078 | 0.0088 |
| 7349.1       | 0.5448 | 1.0579 | 7.4946  | 17.7520 | 0.0230 | 0.1855 | 1.7015 | 0.2903 | 0.1506 | 0.6568 | 0.0125 | 0.0125 | 0.0164 | 4.5805  | 0.0025 | 0.0085 | 0.0042 |
| 10-169-1056  | 0.5071 | 1.5819 | 8.7345  | 15.0535 | 0.0455 | 0.1070 | 1.5566 | 0.2207 | 0.0284 | 0.4091 | 0.0126 | 0.0107 | 0.0071 | 8.3313  | 0.0035 | 0.0039 | 0.0020 |
| 10169.908    | 0.2847 | 0.9624 | 10.7687 | 19.4069 | 0.0338 | 0.2025 | 2.1682 | 0.2397 | 0.2109 | 0.5473 | 0.0321 | 0.0181 | 0.0147 | 12.0839 | 0.0049 | 0.0053 | 0.0157 |
| 23578        | 0.5338 | 0.3502 | 6.0754  | 17.5081 | 0.0256 | 1.7146 | 1.4306 | 0.4031 | 0.1414 | 0.7444 | 0.0150 | 0.0092 | 0.0598 | 3.8641  | 0.0024 | 0.0155 | 0.0218 |
| 310.2        | 0.5080 | 0.3976 | 8.6778  | 22.8372 | 0.0003 | 0.3278 | 4.5655 | 0.6589 | 0.1343 | 0.6605 | 0.0171 | 0.0125 | 0.0270 | 3.1829  | 0.0018 | 0.0114 | 0.0191 |
| 467.3        | 0.4582 | 0.3468 | 2.4418  | 9.2154  | 0.0916 | 0.3920 | 1.4330 | 3.5999 | 0.2058 | 0.0858 | 0.0337 | 0.0050 | 0.1620 | 14.4645 | 0.0046 | 0.0009 | 0.0084 |
| 903.4        | 0.4907 | 0.3749 | 9.6552  | 23.9217 | 0.0124 | 0.1858 | 2.3670 | 0.2837 | 0.2803 | 0.8054 | 0.0135 | 0.0129 | 0.0253 | 3.8376  | 0.0024 | 0.0121 | 0.0076 |
| 2227.7       | 0.5371 | 0.3560 | 7.6107  | 16.7130 | 0.0050 | 0.3105 | 0.9882 | 0.6330 | 0.1958 | 0.8979 | 0.0211 | 0.0124 | 0.0178 | 5.6598  | 0.0032 | 0.0084 | 0.0064 |
| 2244.2       | 0.5452 | 0.3333 | 8.4022  | 12.8660 | 0.0072 | 0.1957 | 2.9118 | 2.3040 | 0.4271 | 1.2414 | 0.0117 | 0.0020 | 0.1265 | 4.3813  | 0.0032 | 0.0084 | 0.0074 |
| 2450.1       | 0.4995 | 0.4112 | 8.6352  | 19.6731 | 0.1191 | 0.2317 | 0.7643 | 1.7788 | 0.2647 | 0.9232 | 0.0194 | 0.0116 | 0.0221 | 5.4226  | 0.0032 | 0.0091 | 0.0071 |
| 3589.5       | 0.4946 | 0.3791 | 8.1622  | 23.3189 | 0.0248 | 0.9171 | 2.9477 | 0.3200 | 0.1519 | 0.5987 | 0.0208 | 0.0118 | 0.0315 | 4.5302  | 0.0024 | 0.0101 | 0.0098 |
| 3985.3       | 0.5171 | 0.3596 | 8.9335  | 19.3878 | 0.0110 | 0.5860 | 1.7048 | 0.3139 | 0.1755 | 0.7255 | 0.0173 | 0.0152 | 0.0226 | 5.6252  | 0.0030 | 0.0095 | 0.0062 |
| 14808        | 0.5322 | 0.4414 | 4.9410  | 14.6401 | 0.0230 | 1.2905 | 1.5353 | 0.5050 | 0.1031 | 0.4371 | 0.0111 | 0.0145 | 0.0128 | 5.8707  | 0.0029 | 0.0058 | 0.0112 |
| 14820        | 0.4913 | 0.3157 | 4.8499  | 23.4951 | 0.0150 | 1.0798 | 1.8031 | 1.8855 | 0.1302 | 0.5421 | 0.0145 | 0.0113 | 0.0339 | 3.4097  | 0.0018 | 0.0117 | 0.0087 |
| 19832        | 0.4236 | 0.6948 | 4.7318  | 17.3472 | 0.0305 | 1.4882 | 1.4015 | 0.8063 | 0.4927 | 0.2076 | 0.0063 | 0.0718 | 3.0663 | 3.1613  | 0.0006 | 0.0406 | 0.1254 |
| 308          | 0.2715 | 0.1846 | 8.6142  | 25.5860 | 0.0943 | 0.1577 | 1.7465 | 0.4441 | 0.2457 | 0.5155 | 0.0049 | 0.0100 | 0.0164 | 5.2740  | 0.0029 | 0.0072 | 0.0001 |
| 308 saucer   | 0.5589 | 2.1408 | 4.7142  | 14.8820 | 0.0335 | 0.2289 | 1.2424 | 0.3768 | 0.0652 | 0.4362 | 0.0050 | 0.0081 | 0.0126 | 5.2388  | 0.0024 | 0.0039 | 0.0002 |
| 1244         | 0.4850 | 0.9769 | 6.8515  | 20.9255 | 0.0589 | 0.0747 | 1.4492 | 0.4600 | 0.0968 | 0.5587 | 0.0118 | 0.0106 | 0.0123 | 5.8285  | 0.0031 | 0.0069 | 0.0002 |
| 2244.4       | 0.5111 | 1.2892 | 5.7870  | 19.4991 | 0.0674 | 0.0279 | 1.9513 | 0.4548 | 0.1457 | 0.3884 | 0.0058 | 0.0076 | 0.0236 | 4.3615  | 0.0021 | 0.0068 | 0.0021 |
| 2244.5       | 0.5632 | 1.8672 | 5.1604  | 15.2023 | 0.0431 | 0.0955 | 1.4741 | 0.5907 | 0.1248 | 0.4020 | 0.0021 | 0.0079 | 0.0154 | 4.9932  | 0.0023 | 0.0042 | 0.0024 |
| 2244.12      | 0.5652 | 1.9570 | 4.7242  | 15.2693 | 0.0470 | 0.2468 | 1.3923 | 0.5320 | 0.1564 | 0.4378 | 0.0049 | 0.0082 | 0.0156 | 4.7196  | 0.0023 | 0.0066 | 0.0004 |
| 2244.14      | 0.4669 | 1.1078 | 5.8247  | 17.3194 | 0.1029 | 1.2715 | 1.2259 | 0.5206 | 0.0873 | 0.4219 | 0.0073 | 0.0073 | 0.0215 | 5.0556  | 0.0024 | 0.0055 | 0.0007 |
| 2272.1       | 0.3722 | 0.1924 | 9.2283  | 22.6380 | 0.0810 | 0.1100 | 1.6868 | 0.4426 | 0.1855 | 0.5463 | 0.0081 | 0.0111 | 0.0156 | 5.4347  | 0.0030 | 0.0075 | 0.0005 |
| 2272.2       | 0.4102 | 0.4569 | 7.9990  | 21.9669 | 0.0883 | 0.2086 | 1.7666 | 0.6457 | 0.2099 | 0.4893 | 0.0057 | 0.0099 | 0.0171 | 5.2622  | 0.0028 | 0.0071 | 0.0011 |
| 2272.3       | 0.4934 | 1.3938 | 6.5234  | 17.8129 | 0.0570 | 0.0663 | 1.3852 | 0.4208 | 0.1374 | 0.4611 | 0.0054 | 0.0087 | 0.0151 | 5.0842  | 0.0026 | 0.0056 | 0.0005 |
| 2272.4       | 0.5539 | 2.3061 | 5.8575  | 11.9461 | 0.0424 | 0.1180 | 1.0190 | 0.2563 | 0.0331 | 0.3607 | 0.0158 | 0.0111 | 0.0002 | 8.9513  | 0.0038 | 0.0034 | 0.0006 |
| 2272.5       | 0.4654 | 0.7235 | 7.5981  | 21.2472 | 0.0564 | 0.0948 | 1.6006 | 0.4113 | 0.1416 | 0.5315 | 0.0093 | 0.0106 | 0.0155 | 5.3950  | 0.0029 | 0.0070 | 0.0006 |
| 2272.6       | 0.4002 | 0.1504 | 8.5100  | 24.1797 | 0.1342 | 0.1173 | 2.5571 | 0.6357 | 0.2126 | 0.4430 | 0.0087 | 0.0021 | 0.3065 | 3.7585  | 0.0022 | 0.0090 | 0.0031 |
| 2272.7       | 0.3777 | 0.3291 | 8.8378  | 23.6672 | 0.0902 | 0.1408 | 1.8732 | 0.5772 | 0.2318 | 0.5459 | 0.0091 | 0.0108 | 0.0180 | 5.0297  | 0.0029 | 0.0081 | 0.0012 |
| 2272.8       | 0.4020 | 0.2744 | 8.5179  | 23.5679 | 0.1498 | 0.0811 | 2.2902 | 0.5930 | 0.2026 | 0.4489 | 0.0091 | 0.0076 | 0.0351 | 4.6685  | 0.0024 | 0.0085 | 0.0029 |
| 2272.9       | 0.4762 | 0.7801 | 7.0568  | 22.1701 | 0.0584 | 0.0131 | 1.3996 | 0.4141 | 0.1734 | 0.5245 | 0.0068 | 0.0107 | 0.0153 | 5.4444  | 0.0029 | 0.0068 | 0.0002 |
| 2272.10      | 0.5636 | 2.2356 | 4.1673  | 12.8368 | 0.0520 | 0.7124 | 1.0550 | 0.4831 | 0.0702 | 0.3818 | 0.0152 | 0.0069 | 0.0161 | 4.5482  | 0.0021 | 0.0051 | 0.0010 |
| 5391         | 0.4580 | 0.6351 | 7.3300  | 22.2061 | 0.0619 | 0.0922 | 1.4612 | 0.4030 | 0.1395 | 0.5145 | 0.0061 | 0.0098 | 0.0144 | 5.4205  | 0.0028 | 0.0063 | 0.0003 |
| 7114.1       | 0.5562 | 2.2630 | 5.9182  | 12.2518 | 0.0503 | 0.0970 | 0.9952 | 0.2774 | 0.0376 | 0.3758 | 0.0176 | 0.0112 | 0.0003 | 9.1511  | 0.0039 | 0.0035 | 0.0007 |
| 7114.2       | 0.3997 | 0.2505 | 8.2380  | 22.9083 | 0.0789 | 0.0994 | 1.7181 | 0.7698 | 0.2182 | 0.5032 | 0.0054 | 0.0104 | 0.0184 | 5.4086  | 0.0029 | 0.0074 | 0.0005 |
| 7114.3       | 0.5349 | 1.6833 | 6.2238  | 16.5683 | 0.0428 | 0.0679 | 1.2921 | 0.3799 | 0.0995 | 0.4662 | 0.0058 | 0.0092 | 0.0137 | 5.3259  | 0.0026 | 0.0054 | 0.0004 |
| 7114.4 (lid) | 0.4882 | 0.9584 | 7.9498  | 19.8912 | 0.0632 | 0.0457 | 1.5832 | 0.4087 | 0.1482 | 0.5507 | 0.0090 | 0.0105 | 0.0151 | 5.4798  | 0.0030 | 0.0069 | 0.0005 |
| 7114.4       | 0.5537 | 1.9679 | 5.8842  | 14.9891 | 0.0378 | 0.0344 | 1.2176 | 0.3113 | 0.1168 | 0.4729 | 0.0062 | 0.0099 | 0.0120 | 5.7170  | 0.0028 | 0.0050 | 0.0001 |
| 7114.5 (lid) | 0.4965 | 1.0928 | 6.8804  | 18.8420 | 0.0697 | 0.2474 | 1.5838 | 0.6533 | 0.1800 | 0.4586 | 0.0027 | 0.0078 | 0.0199 | 5.2289  | 0.0026 | 0.0050 | 0.0002 |
| 7114.5       | 0.4701 | 0.9419 | 7.2640  | 20.2056 | 0.0596 | 0.1509 | 1.5673 | 0.5490 | 0.1463 | 0.5023 | 0.0045 | 0.0089 | 0.0170 | 5.0922  | 0.0026 | 0.0060 | 0.0005 |
| 7114.6       | 0.4484 | 0.7489 | 7.6971  | 21.0104 | 0.0683 | 0.0582 | 1.5869 | 0.4772 | 0.1808 | 0.5080 | 0.0049 | 0.0102 | 0.0147 | 5.4390  | 0.0029 | 0.0063 | 0.0003 |
| 10750        | 0.5021 | 1.1472 | 6.1421  | 19.7550 | 0.0567 | 0.0793 | 1.4281 | 0.3835 | 0.1231 | 0.4909 | 0.0058 | 0.0095 | 0.0134 | 5.4375  | 0.0027 | 0.0058 | 0.0003 |
| 14810        | 0.4136 | 0.4157 | 7.4316  | 23.0499 | 0.0722 | 0.0900 | 1.6551 | 0.4336 | 0.1812 | 0.5516 | 0.0071 | 0.0109 | 0.0142 | 5.5370  | 0.0030 | 0.0072 | 0.0003 |

| Code         | ZnKa1  | AsKa1   | PbLa1  | ThLa1  | RbKa1  | U La1  | SrKa1  | Y Ka1  | ZrKa1  | NbKa1  | MoKa1  | SnKa1  | SbKa1  |
|--------------|--------|---------|--------|--------|--------|--------|--------|--------|--------|--------|--------|--------|--------|
| 457          | 0.0074 | 0.0016  | 0.0015 | 0.0001 | 0.0030 | 0.0014 | 0.0026 | 0.0008 | 0.0051 | 0.0007 | 0.0093 | 0.0006 | 0.0078 |
| 459          | 0.0082 | 0.0019  | 0.0018 | 0.0002 | 0.0028 | 0.0007 | 0.0031 | 0.0010 | 0.0039 | 0.0007 | 0.0090 | 0.0006 | 0.0080 |
| 462          | 0.0037 | 0.0366  | 0.0049 | 0.0002 | 0.0017 | 0.0028 | 0.0039 | 0.0013 | 0.0043 | 0.0009 | 0.0075 | 0.0006 | 0.0080 |
| 466          | 0.0036 | 0.0019  | 0.0017 | 0.0001 | 0.0004 | 0.0048 | 0.0028 | 0.0001 | 0.0059 | 0.0006 | 0.0099 | 0.0007 | 0.0081 |
| 903          | 0.0065 | 0.5376  | 0.0173 | 0.0006 | 0.0002 | 0.0035 | 0.0041 | 0.0017 | 0.0069 | 0.0008 | 0.0101 | 0.0007 | 0.0084 |
| 3984.3       | 0.0083 | 0.0012  | 0.0015 | 0.0002 | 0.0031 | 0.0008 | 0.0037 | 0.0011 | 0.0040 | 0.0007 | 0.0091 | 0.0006 | 0.0079 |
| 434.6        | 0.0144 | 0.0034  | 0.0020 | 0.0001 | 0.0038 | 0.0009 | 0.0040 | 0.0009 | 0.0044 | 0.0007 | 0.0092 | 0.0006 | 0.0078 |
| 7349.1       | 0.0070 | 0.0009  | 0.0015 | 0.0001 | 0.0029 | 0.0009 | 0.0036 | 0.0015 | 0.0044 | 0.0009 | 0.0074 | 0.0006 | 0.0080 |
| 10-169-1056  | 0.0097 | 0.0014  | 0.0017 | 0.0001 | 0.0041 | 0.0013 | 0.0043 | 0.0019 | 0.0038 | 0.0009 | 0.0056 | 0.0006 | 0.0081 |
| 10169.908    | 0.0196 | 0.0058  | 0.0025 | 0.0001 | 0.0030 | 0.0033 | 0.0048 | 0.0009 | 0.0044 | 0.0005 | 0.0090 | 0.0007 | 0.0082 |
| 23578        | 0.0064 | 0.0118  | 0.0033 | 0.0001 | 0.0027 | 0.0007 | 0.0034 | 0.0012 | 0.0043 | 0.0008 | 0.0091 | 0.0006 | 0.0079 |
| 310.2        | 0.0511 | 0.0081  | 0.0026 | 0.0003 | 0.0113 | 0.0003 | 0.0038 | 0.0005 | 0.0043 | 0.0003 | 0.0092 | 0.0006 | 0.0079 |
| 467.3        | 0.0066 | 0.0491  | 0.0057 | 0.0003 | 0.0017 | 0.0070 | 0.0019 | 0.0004 | 0.0051 | 0.0006 | 0.0096 | 0.0006 | 0.0079 |
| 903.4        | 0.0096 | 0.0021  | 0.0017 | 0.0001 | 0.0039 | 0.0006 | 0.0025 | 0.0012 | 0.0021 | 0.0007 | 0.0088 | 0.0006 | 0.0080 |
| 2227.7       | 0.0071 | 0.0167  | 0.0038 | 0.0001 | 0.0021 | 0.0015 | 0.0039 | 0.0009 | 0.0051 | 0.0008 | 0.0093 | 0.0006 | 0.0079 |
| 2244.2       | 0.0105 | 0.0375  | 0.0051 | 0.0001 | 0.0024 | 0.0019 | 0.0009 | 0.0012 | 0.0049 | 0.0007 | 0.0094 | 0.0007 | 0.0082 |
| 2450.1       | 0.0099 | 0.0165  | 0.0037 | 0.0001 | 0.0021 | 0.0013 | 0.0040 | 0.0010 | 0.0048 | 0.0008 | 0.0092 | 0.0006 | 0.0079 |
| 3589.5       | 0.0139 | 0.0198  | 0.0037 | 0.0001 | 0.0062 | 0.0002 | 0.0042 | 0.0009 | 0.0046 | 0.0006 | 0.0094 | 0.0007 | 0.0083 |
| 3985.3       | 0.0073 | 0.0072  | 0.0027 | 0.0001 | 0.0024 | 0.0012 | 0.0037 | 0.0010 | 0.0047 | 0.0007 | 0.0092 | 0.0006 | 0.0079 |
| 14808        | 0.0049 | 3.1262  | 0.0293 | 0.0014 | 0.0043 | 0.0070 | 0.0048 | 0.0024 | 0.0065 | 0.0008 | 0.0110 | 0.0007 | 0.0087 |
| 14820        | 0.0141 | 0.0035  | 0.0020 | 0.0001 | 0.0046 | 0.0001 | 0.0022 | 0.0009 | 0.0056 | 0.0007 | 0.0091 | 0.0007 | 0.0081 |
| 19832        | 0.1342 | 13.3414 | 0.0810 | 0.0040 | 0.0103 | 0.0190 | 0.0042 | 0.0060 | 0.0089 | 0.0006 | 0.0130 | 0.0007 | 0.0092 |
| 308          | 0.0017 | 0.0061  | 0.0027 | 0.0002 | 0.0019 | 0.0027 | 0.0037 | 0.0016 | 0.0036 | 0.0010 | 0.0055 | 0.0006 | 0.0080 |
| 308 saucer   | 0.0042 | 0.0079  | 0.0029 | 0.0002 | 0.0020 | 0.0025 | 0.0037 | 0.0016 | 0.0037 | 0.0010 | 0.0055 | 0.0006 | 0.0080 |
| 1244         | 0.0000 | 0.0018  | 0.0019 | 0.0001 | 0.0014 | 0.0030 | 0.0038 | 0.0015 | 0.0036 | 0.0010 | 0.0055 | 0.0006 | 0.0079 |
| 2244.4       | 0.0063 | 0.0010  | 0.0016 | 0.0000 | 0.0035 | 0.0011 | 0.0037 | 0.0019 | 0.0024 | 0.0010 | 0.0055 | 0.0006 | 0.0080 |
| 2244.5       | 0.0096 | 0.0037  | 0.0022 | 0.0001 | 0.0022 | 0.0022 | 0.0037 | 0.0016 | 0.0037 | 0.0010 | 0.0055 | 0.0006 | 0.0080 |
| 2244.12      | 0.0013 | 0.0053  | 0.0025 | 0.0001 | 0.0026 | 0.0020 | 0.0036 | 0.0017 | 0.0036 | 0.0010 | 0.0055 | 0.0006 | 0.0080 |
| 2244.14      | 0.0035 | 0.4602  | 0.0153 | 0.0012 | 0.0013 | 0.0061 | 0.0040 | 0.0024 | 0.0042 | 0.0010 | 0.0054 | 0.0006 | 0.0081 |
| 2272.1       | 0.0003 | 0.0014  | 0.0018 | 0.0001 | 0.0019 | 0.0027 | 0.0037 | 0.0015 | 0.0035 | 0.0010 | 0.0054 | 0.0006 | 0.0079 |
| 2272.2       | 0.0025 | 0.0013  | 0.0017 | 0.0001 | 0.0022 | 0.0025 | 0.0037 | 0.0016 | 0.0032 | 0.0010 | 0.0054 | 0.0006 | 0.0079 |
| 2272.3       | 0.0023 | 0.0011  | 0.0016 | 0.0001 | 0.0028 | 0.0017 | 0.0037 | 0.0017 | 0.0037 | 0.0010 | 0.0055 | 0.0006 | 0.0080 |
| 2272.4       | 0.0031 | 0.0011  | 0.0016 | 0.0001 | 0.0005 | 0.0048 | 0.0019 | 0.0012 | 0.0047 | 0.0010 | 0.0056 | 0.0006 | 0.0080 |
| 2272.5       | 0.0012 | 0.0043  | 0.0024 | 0.0001 | 0.0017 | 0.0029 | 0.0037 | 0.0016 | 0.0036 | 0.0010 | 0.0054 | 0.0006 | 0.0080 |
| 2272.6       | 0.0060 | 0.0012  | 0.0017 | 0.0001 | 0.0033 | 0.0016 | 0.0037 | 0.0019 | 0.0022 | 0.0010 |        |        |        |
| 2272.7       | 0.0012 | 0.0014  | 0.0018 | 0.0001 | 0.0021 | 0.0025 | 0.0036 | 0.0016 | 0.0035 | 0.0010 | 0.0054 | 0.0006 | 0.0079 |
| 2272.8       | 0.0060 | 0.0015  | 0.0017 | 0.0001 | 0.0029 | 0.0018 | 0.0036 | 0.0018 | 0.0022 | 0.0010 | 0.0053 | 0.0006 | 0.0079 |
| 2272.9       | 0.0006 | 0.0011  | 0.0017 | 0.0001 | 0.0018 | 0.0027 | 0.0037 | 0.0015 | 0.0035 | 0.0010 | 0.0054 | 0.0006 | 0.0080 |
| 2272.10      | 0.0053 | 0.0081  | 0.0029 | 0.0001 | 0.0026 | 0.0019 | 0.0038 | 0.0018 | 0.0037 | 0.0010 | 0.0056 | 0.0006 | 0.0080 |
| 5391         | 0.0004 | 0.0023  | 0.0020 | 0.0001 | 0.0018 | 0.0027 | 0.0037 | 0.0016 | 0.0035 | 0.0010 | 0.0054 | 0.0006 | 0.0079 |
| 7114.1       | 0.0028 | 0.0012  | 0.0017 | 0.0001 | 0.0005 | 0.0048 | 0.0020 | 0.0012 | 0.0047 | 0.0010 | 0.0056 | 0.0006 | 0.0080 |
| 7114.2       | 0.0001 | 0.0012  | 0.0017 | 0.0001 | 0.0020 | 0.0025 | 0.0036 | 0.0016 | 0.0034 | 0.0010 | 0.0054 | 0.0006 | 0.0079 |
| 7114.3       | 0.0032 | 0.0012  | 0.0017 | 0.0001 | 0.0022 | 0.0023 | 0.0037 | 0.0016 | 0.0036 | 0.0010 | 0.0054 | 0.0006 | 0.0079 |
| 7114.4 (lid) | 0.0009 | 0.0011  | 0.0016 | 0.0001 | 0.0018 | 0.0028 | 0.0037 | 0.0015 | 0.0035 | 0.0010 | 0.0054 | 0.0006 | 0.0079 |
| 7114.4       | 0.0029 | 0.0011  | 0.0016 | 0.0001 | 0.0019 | 0.0026 | 0.0037 | 0.0015 | 0.0036 | 0.0010 | 0.0055 | 0.0006 | 0.0079 |
| 7114.5 (lid) | 0.0020 | 0.0019  | 0.0019 | 0.0001 | 0.0020 | 0.0026 | 0.0037 | 0.0016 | 0.0034 | 0.0010 | 0.0054 | 0.0006 | 0.0080 |
| 7114.5       | 0.0024 | 0.0013  | 0.0017 | 0.0001 | 0.0022 | 0.0023 | 0.0037 | 0.0016 | 0.0034 | 0.0010 | 0.0054 | 0.0006 | 0.0079 |
| 7114.6       | 0.0012 | 0.0011  | 0.0017 | 0.0001 | 0.0018 | 0.0028 | 0.0036 | 0.0015 | 0.0035 | 0.0010 | 0.0054 | 0.0006 | 0.0079 |
| 10750        | 0.0019 | 0.0018  | 0.0019 | 0.0001 | 0.0018 | 0.0027 | 0.0037 | 0.0016 | 0.0035 | 0.0010 | 0.0054 | 0.0006 | 0.0079 |
| 14810        | 0.0009 | 0.0015  | 0.0018 | 0.0001 | 0.0017 | 0.0028 | 0.0037 | 0.0015 | 0.0036 | 0.0010 | 0.0055 | 0.0006 | 0.0081 |
